# Supplementary material for: A single-dose mRNA vaccine provides a long-term protection for hACE2 transgenic mice from SARS-CoV-2
Source: PubMed Central journal article supplement (PMC7858593; doi:10.1038/s41467-021-21037-2), 2021-02-03
Supplement: 41467_2021_21037_MOESM1_ESM.pdf [file 41467_2021_21037_MOESM1_ESM.pdf]

Supplementary Information for:

A single-dose mRNA vaccine provides a long-term protection for hACE2  
transgenic mice from SARS-CoV-2

Qingrui Huang<sup>1,†</sup>, Kai Ji<sup>1,2,†</sup>, Siyu Tian<sup>1,2,†</sup>, Fengze Wang<sup>1,2,†</sup>, Baoying Huang<sup>3</sup>,  
Zhou Tong<sup>4,5</sup>, Shuguang Tan<sup>4</sup>, Junfeng Hao<sup>6</sup>, Qihui Wang<sup>1,4</sup>, Wenjie Tan<sup>3✉</sup>,  
George F. Gao<sup>2,4,7✉</sup>, Jinghua Yan<sup>1,2,4✉</sup>

<sup>1</sup> CAS Key Laboratory of Microbial Physiological and Metabolic Engineering,  
Institute of Microbiology, Chinese Academy of Sciences, Beijing 100101,  
China.

<sup>2</sup>University of Chinese Academy of Sciences, Beijing 101408, China.

<sup>3</sup>MHC Key Laboratory of Biosafety, National Institute for Viral Disease Control  
and Prevention, China CDC, Beijing 102206, China.

<sup>4</sup> CAS Key Laboratory of Pathogenic Microbiology and Immunology, Institute of  
Microbiology, Chinese Academy of Sciences, Beijing 100101, China.

<sup>5</sup> Shanxi Academy of Advanced Research and Innovation, Taiyuan 030032,  
China.

<sup>6</sup>Core Facility for Protein Research, Institute of Biophysics, Chinese Academy  
of Sciences, Beijing 100101, China.

<sup>7</sup>Chinese Center for Disease Control and Prevention (China CDC), Beijing  
102206, China

†These authors contributed equally to this work.

✉Corresponding authors. Email: [tanwj@ivdc.chinacdc.cn](mailto:tanwj@ivdc.chinacdc.cn) (Wenjie Tan);

[gaof@im.ac.cn](mailto:gaof@im.ac.cn) (George F. Gao); [yanjh@im.ac.cn](mailto:yanjh@im.ac.cn) (Jinghua Yan).

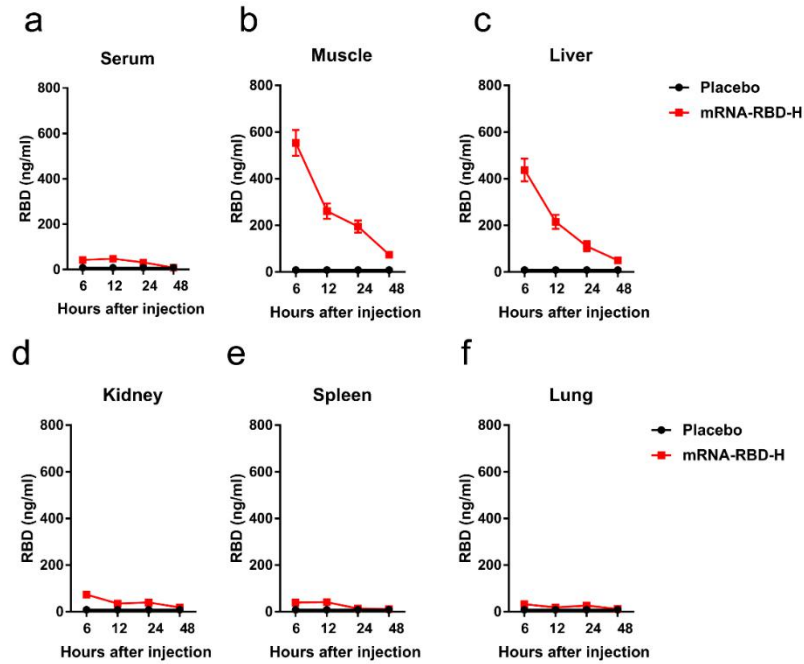

**Supplementary Fig. 1 | Duration and distribution of RBD production from mRNA-RBD LNPs *in vivo*.** Groups of BALB/c mice (n=16) were vaccinated with one injection of 15  $\mu$ g mRNA-RBD or with a placebo. Four mice per group were euthanized at 6, 12, 24 and 48 h post injection. Serum (a), muscle (b), liver (c), kidney (d), spleen (e) and lung (f) samples of each mouse were harvested for quantitation of RBD expression level by ELISA. mRNA-RBD-H indicates the high-dose vaccine (15  $\mu$ g). Data are means  $\pm$  SEM (standard error of the mean). Placebo animals = black circles; mRNA-RBD-H-vaccinated animals = red squares. The data are representative of two independent experiments. Source data are provided as a Source Data file.

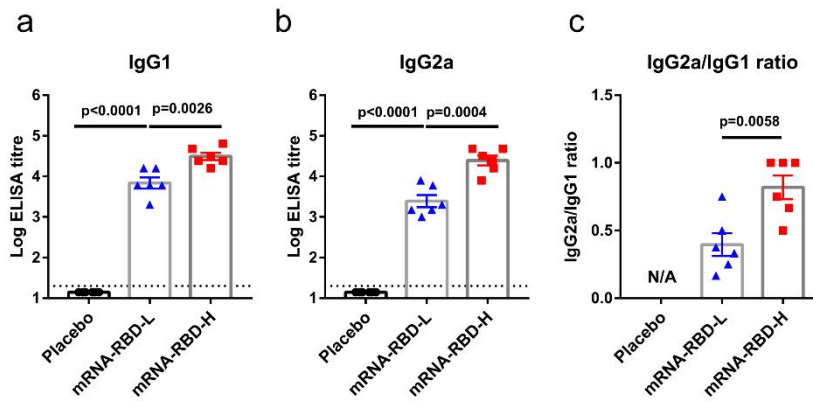

**Supplementary Fig. 2 | A balanced Th1/Th2 immune response induced by mRNA-RBD. Related to Fig. 2.** BALB/c mice (n=6) were immunized with one injection of mRNA-RBD at different doses or with a placebo. Sera were collected four weeks post immunization and assessed by ELISA for SARS-CoV-2 RBD-specific IgG1 (a) and IgG2a (b) titers. c Titer ratios of IgG2a to IgG1 were calculated. mRNA-RBD-L indicates the low dose (2  $\mu$ g). mRNA-RBD-H indicates the high dose (15  $\mu$ g). Data are means  $\pm$  SEM (standard error of the mean). Comparisons were performed by Student's t-test (unpaired, two-tailed). Placebo animals = black circles; mRNA-RBD-L vaccinated animals = blue triangles; mRNA-RBD-H vaccinated animals = red squares; dotted line = the limit of detection. Data are one representative result of three independent experiments. Source data are provided as a Source Data file.

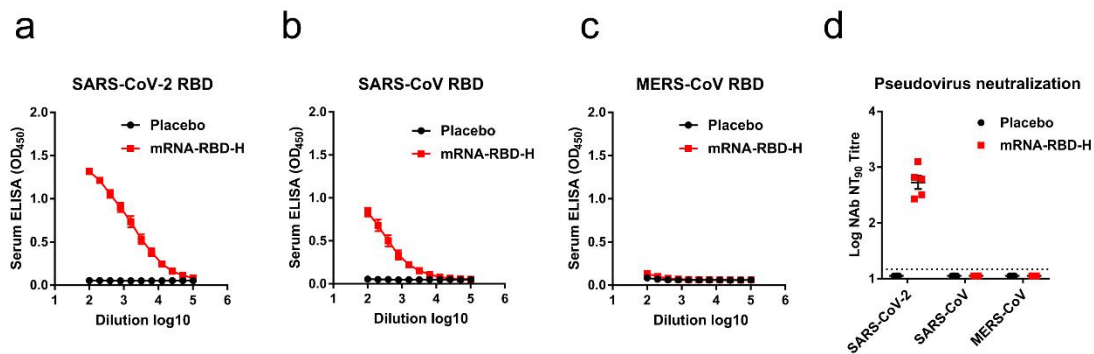

**Supplementary Fig. 3 | Cross-reactivity of mRNA-RBD-induced sera to SARS-CoV and MERS-CoV. Related to Fig. 2.** Groups of BALB/c mice (n=6) were immunized with a single injection of mRNA-RBD or placebo via the i.m. route. Sera at four weeks post immunization were collected. **a-c** ELISA analyses of binding of immunized sera on captured SARS-CoV-2 RBD (**a**), or cross-binding on captured SARS-CoV RBD (**b**) and MERS-CoV RBD (**c**). **d** Pseudovirus-neutralizing antibodies in sera against SARS-CoV-2, SARS-CoV and MERS-CoV were measured as NT<sub>90</sub> titers. mRNA-RBD-H indicates the high-dose vaccine (15 µg). Data are means ± SEM (standard error of the mean). Placebo animals = black circles; mRNA-RBD-H vaccinated animals = red squares; dotted line = the limit of detection. Data are one representative result of three independent experiments. Source data are provided as a Source Data file.

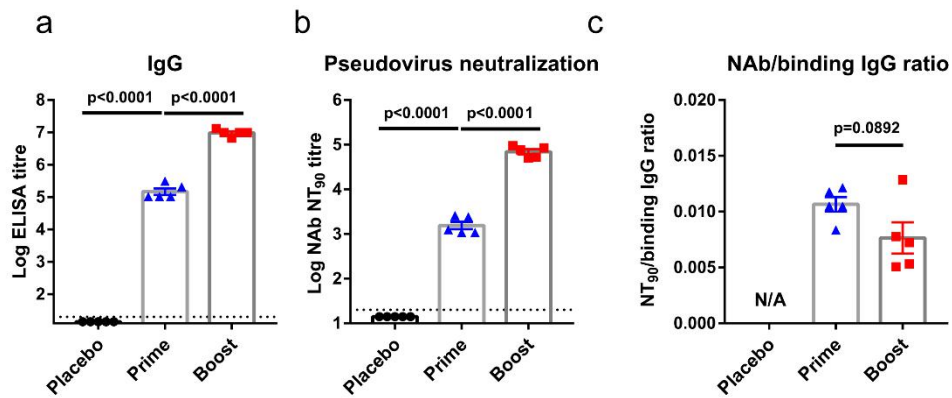

**Supplementary Fig. 4 | Proportion analysis of neutralizing antibody to binding antibody elicited by mRNA-RBD-H prime and boost immunization regimens.** BALB/c mice (n=5) were immunized i.m. with mRNA-RBD-H (15  $\mu$ g) or a placebo. Boost group mice were boosted with an equivalent dose four weeks later. Serum was collected at eight weeks post immunization. RBD-specific IgG titers and pseudovirus-neutralizing antibodies were measured as shown in (a) and (b), respectively. c Titer ratio of neutralizing antibody to RBD-binding antibody was calculated. Data are means  $\pm$  SEM (standard error of the mean). Comparisons were performed by Student's t-test (unpaired, two-tailed). Placebo animals = black circles; one injection-animals = blue triangles; two injections-vaccinated animals = red squares; dotted line = the limit of detection. Data are one representative result of two independent experiments. Source data are provided as a Source Data file.

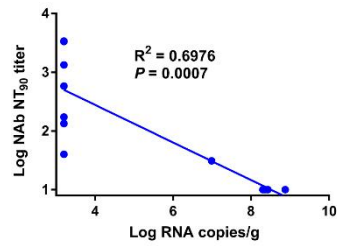

**Supplementary Fig. 5 | Immune correlates of protection against**

**SARS-CoV-2 in hACE2 transgenic mice. Related to Fig. 3.** Correlation of viral loads in mouse lungs and protective efficacy by neutralizing antibody NT<sub>90</sub> titers. The hACE2 mice receiving one or two doses of mRNA-RBD-H or placebo, and whose lung viral RNA loads following SARS-CoV-2 infection were determined (n=4 per group), were included in this analysis. The P and R<sup>2</sup> values reflect Spearman rank-correlation tests.

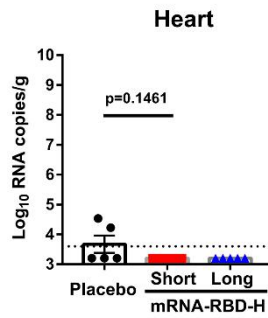

**Supplementary Fig. 6 | Virus titers in heart. Related to Fig. 4.** In the immunization and passive transfer study, heart tissues of challenged hACE2 transgenic mice (n=5) were collected at 5 dpi and were subjected to detection of viral RNAs load. Data are means  $\pm$  SEM (standard error of the mean). Comparisons were performed by Student's t-test (unpaired, two-tailed). Placebo animals = black circles; animals for long term study = blue triangles; animals for short term study = red squares; dotted line = the limit of detection. Data are one representative result of three independent experiments. Source data are provided as a Source Data file.



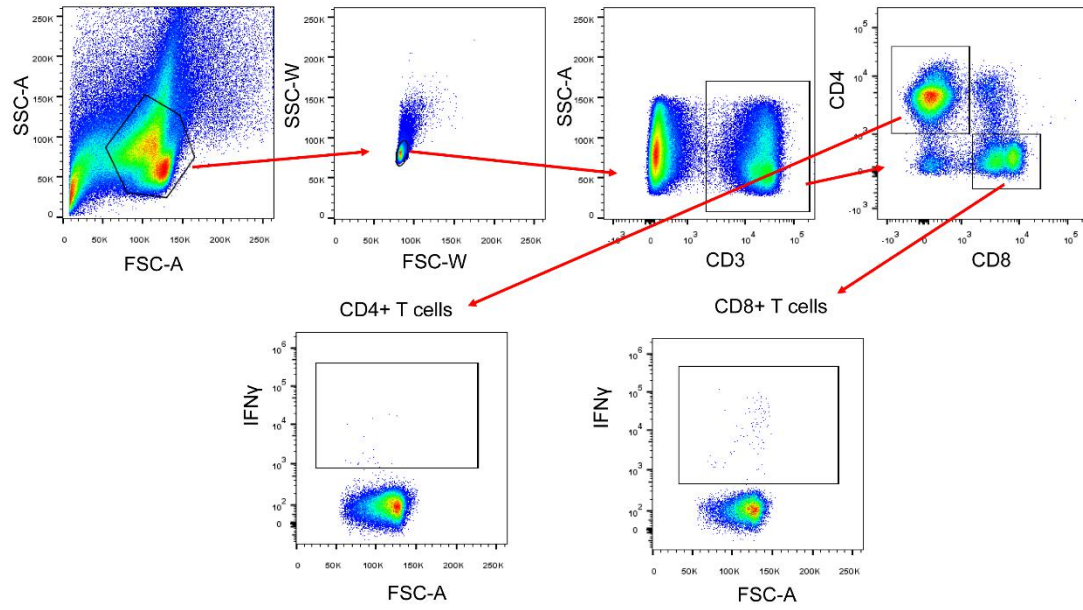

**Supplementary Fig. 7 | Gating strategy of intracellular staining flow cytometry.** Stimulated cells were stained and analyzed by flow cytometry. The Sample was progressively gated to identify single cells, lymphocytes, live CD3+ T cells, and CD4+ or CD8+ T cells as shown in the top row. Within CD4+ or CD8+ T cells, the gate for IFN $\gamma$  was created (bottom).
